# Supplementary material
Source: PubMed Central journal article supplement (PMC2891442)
Supplement: NIHMS202673-supplement-Supplementary_Data.pdf [file NIHMS202673-supplement-Supplementary_Data.pdf]

# Supplementary Figure 1A & B

**A)**

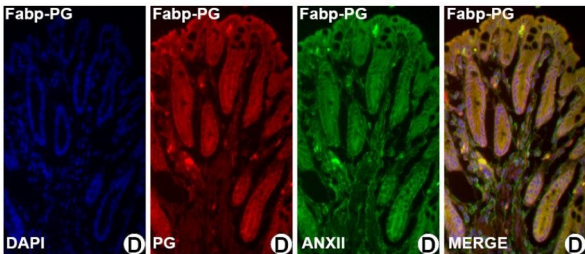

**B)**

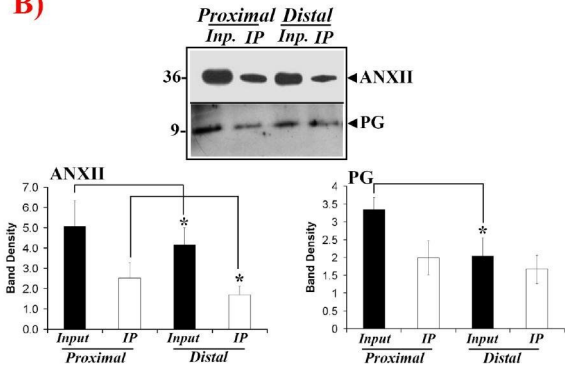

# Supplementary Figure 2

**Ai)**

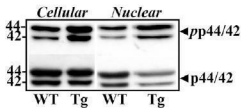

**Aii)**

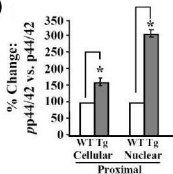

**B)**

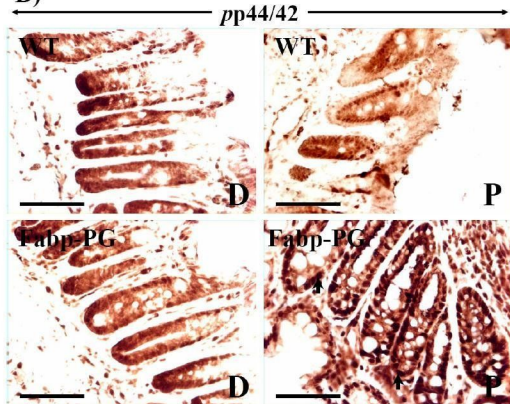

### Supplementary Figure 3

**A)**

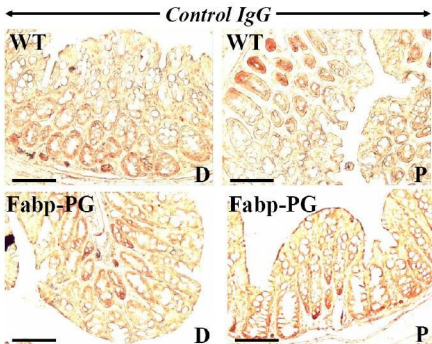

**B)**

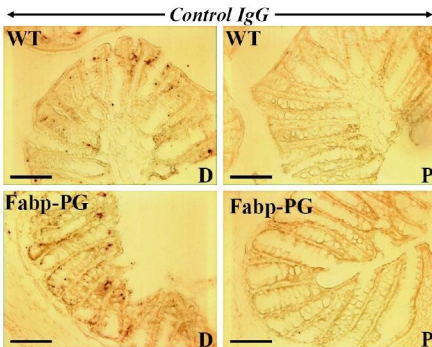

Supplementary Figure 4

*pp65*<sup>276</sup>

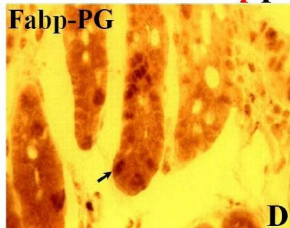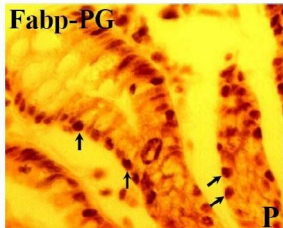

Hematoxylin

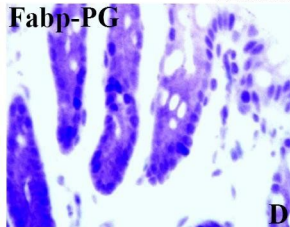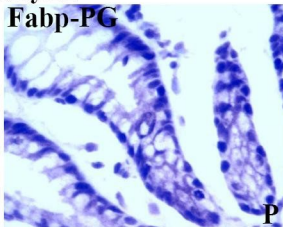

200X
